# Supplementary material for: FGFR3 Alterations in Bladder Cancer Stimulate Serine Synthesis to Induce Immune-Inert Macrophages That Suppress T-cell Recruitment and Activation
Source: PubMed Central journal article supplement — Cancer Res. 2023 Sep 28;83(24):4030–46. doi: 10.1158/0008-5472.CAN-23-1065 (PMC10722136; doi:10.1158/0008-5472.can-23-1065), 2023-09-28
Supplement: can-23-1065_supplementary_figures_1-6_suppsf1-sf6.pdf [file can-23-1065_supplementary_figures_1-6_suppsf1-sf6.pdf]

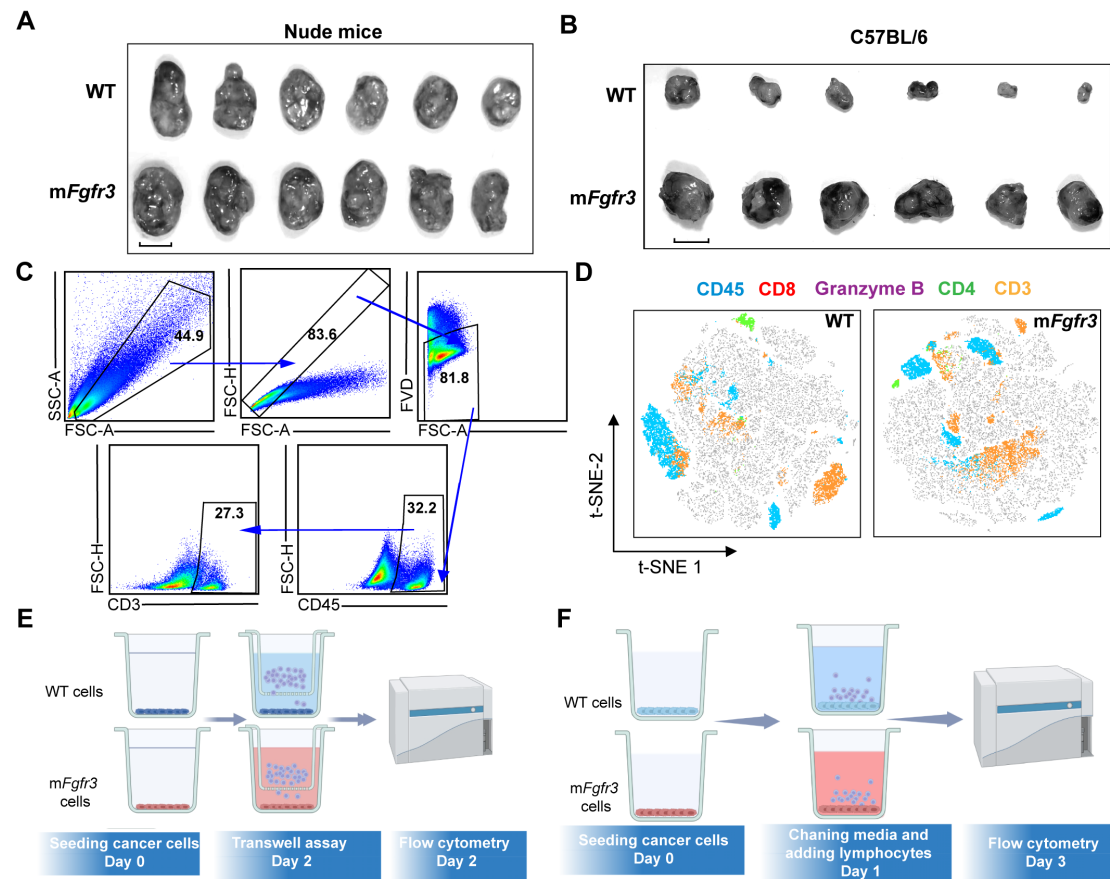

**Supplementary Figure 1: *FGFR3*-altered bladder cancers shape a cold TME indirectly, related to Figure 1.**

**A, B**, Picture of dissected tumors of the WT and *mFgfr3* tumors in the nude mice (**A**) and C57BL/6 mice (**B**).

**C**, Gating strategy for flow cytometry analysis on T cells in this study.

**D**, t-SNE plots show the landscape of infiltration of various types of T cells in the WT and *mFgfr3* tumors.

**E, F**, Schematic illustration shows the preparation of cancer supernatants-lymphocytes transwell assay (**E**) and the cancer cells-lymphocytes co-culture assay (**F**).

Scale bar: 1cm. (**E, F**: created with BioRender.com).

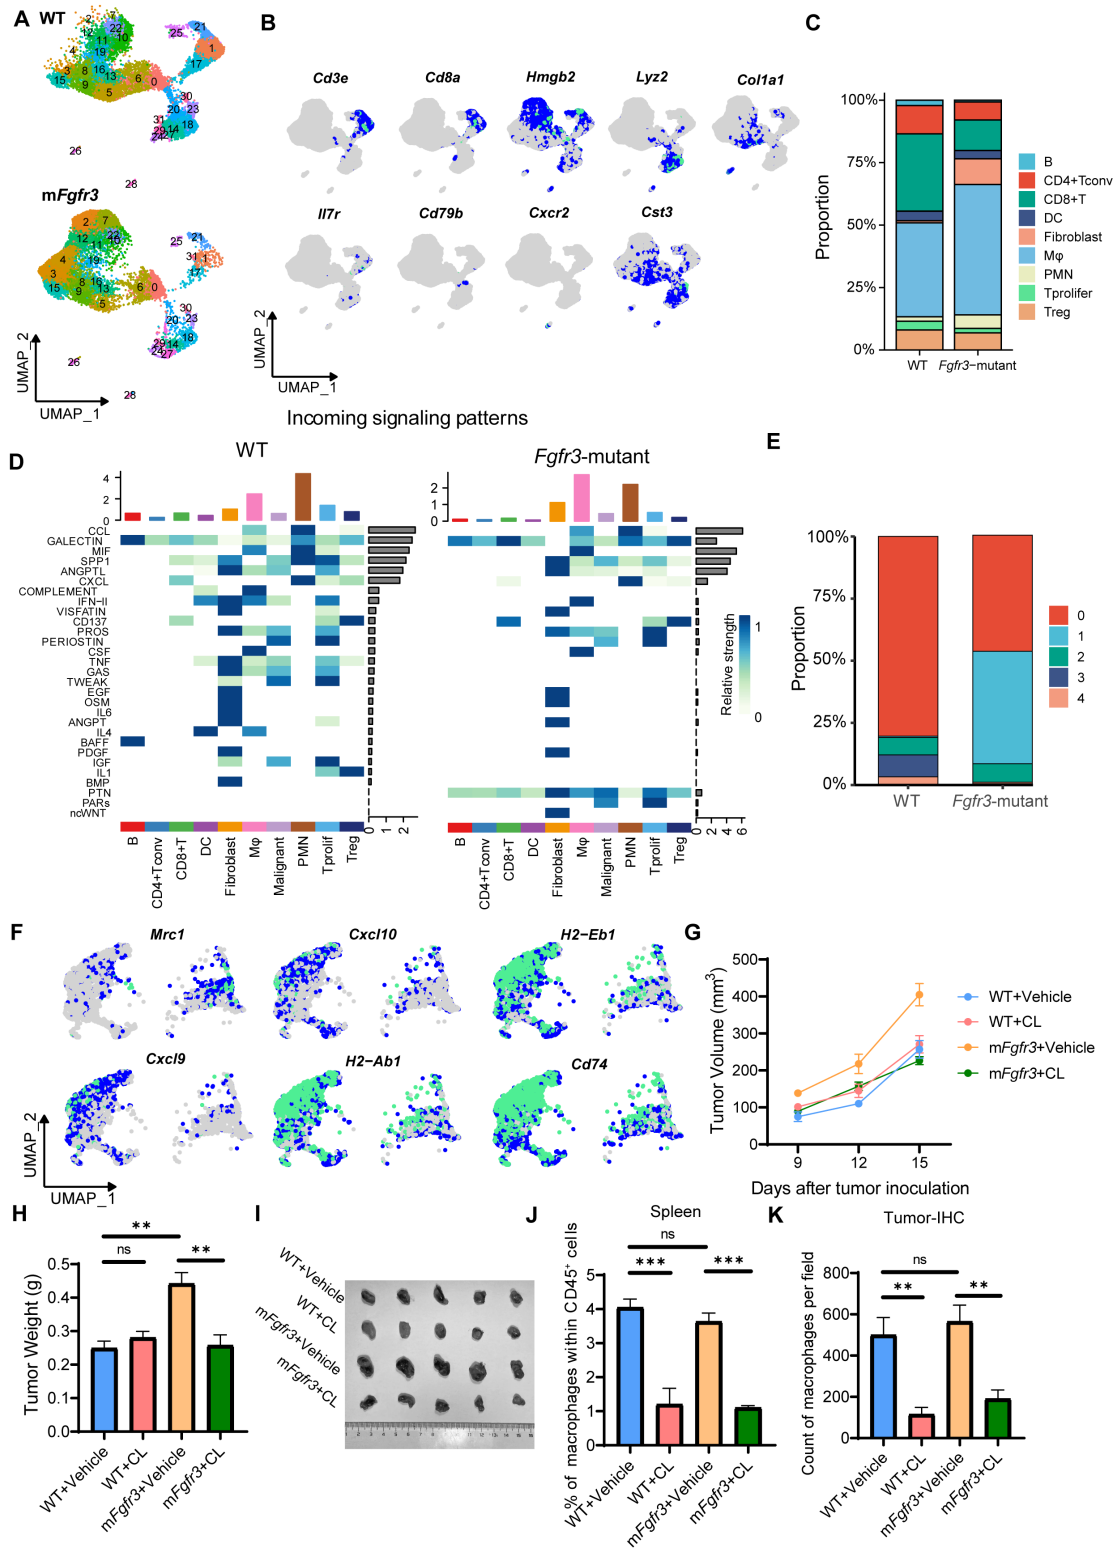

**Supplementary Figure 2. scRNA-seq highlights the central role of macrophages in inducing the cold TME of the mFgfr3 tumor, related to Figure 2.**

**A**, UMAP plot of single cells RNA sequencing results of WT and mFgfr3 MB49 mice tumors colored by clusters

**B**, FeaturePlots shows the expression of cluster-specific genes.

**C**, Stacked bar plot shows the proportion of each cell type in the WT and *mFgfr3* tumors.

**D**, Heatmap illustrates the level of incoming signaling to each cell type.

**E**, Stacked bar plot shows the proportion of each sub-cluster within macrophages in the WT and *mFgfr3* tumors.

**F**, FeaturePlots shows the expression of upregulated and downregulated genes in the sub-cluster 1 macrophages compared with other macrophages, left: macrophages from WT tumors; right: macrophages from *mFgfr3* tumors.

**G, H**, Growth curves (**G**) and tumor weights (**H**) of tumors in the indicated groups.

**I**, Picture of dissected tumors of the indicated groups.

**J**, Statistic analysis of the infiltration of macrophages in the spleens of the indicated group.

**K**, Statistic analysis of the infiltration of macrophages in the tumors of the indicated group

Error bars represent the mean  $\pm$  SEM.  $p < 0.05$  was considered a significant difference, ns was no significance (one-way ANOVA with Holm-Sidak multiple comparison tests and unpaired parametric Student's t-test). \* $p < 0.05$ , \*\* $p < 0.01$ , \*\*\* $p < 0.001$ . M $\phi$ : Macrophages.

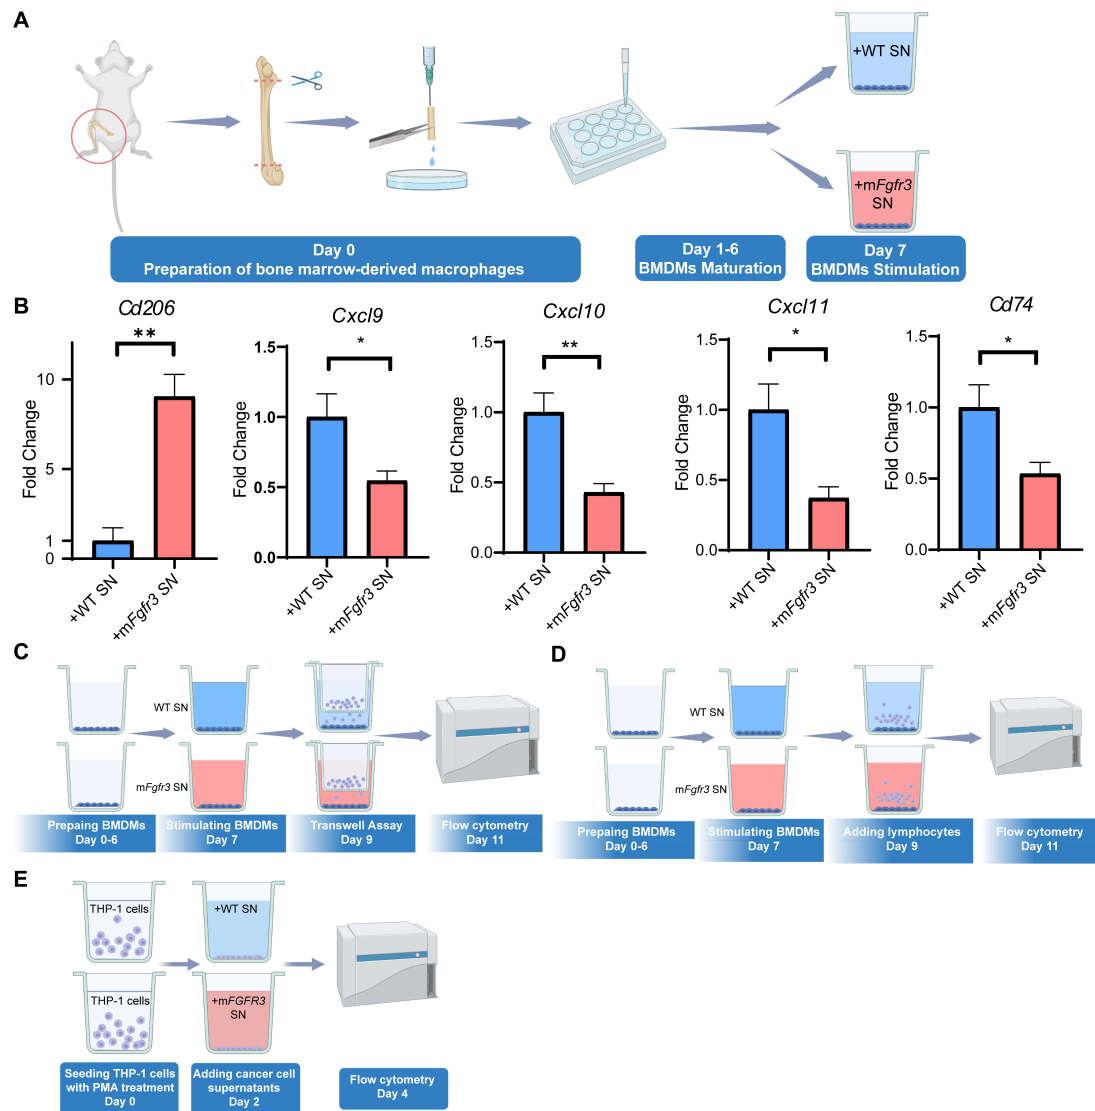

**Supplementary Figure 3. *mFgfr3* cancer cells promote macrophage shift to an immune-inert phenotype, related to Figure 3.**

**A**, Schematic illustration of preparation and stimulation of the BMDMs.

**B**, Histograms show the qRT-PCR results of *Cd206*, *Cxcl9*, *Cxcl10*, *Cxcl11*, and *Cd74* expression in the macrophages stimulated with the WT and *mFgfr3* supernatants,  $n = 3$ .

**C**, **D**, Schematic illustration shows the preparation of the BMDMs-splenocytes transwell assay (**C**) and the *in vitro* BMDMs-splenocytes co-culture assay (**D**).

**E**, Schematic illustration of preparation, culturing, and stimulation of THP-1 cells, PMA: phorbol 12-myristate 13-acetate.

Error bars represent the mean  $\pm$  SEM.  $p < 0.05$  was considered a significant difference, ns was no significance (unpaired parametric Student's t-test). \* $p < 0.05$ , \*\* $p < 0.01$ . (**A**, **C**, **D**, **E**: created with BioRender.com).

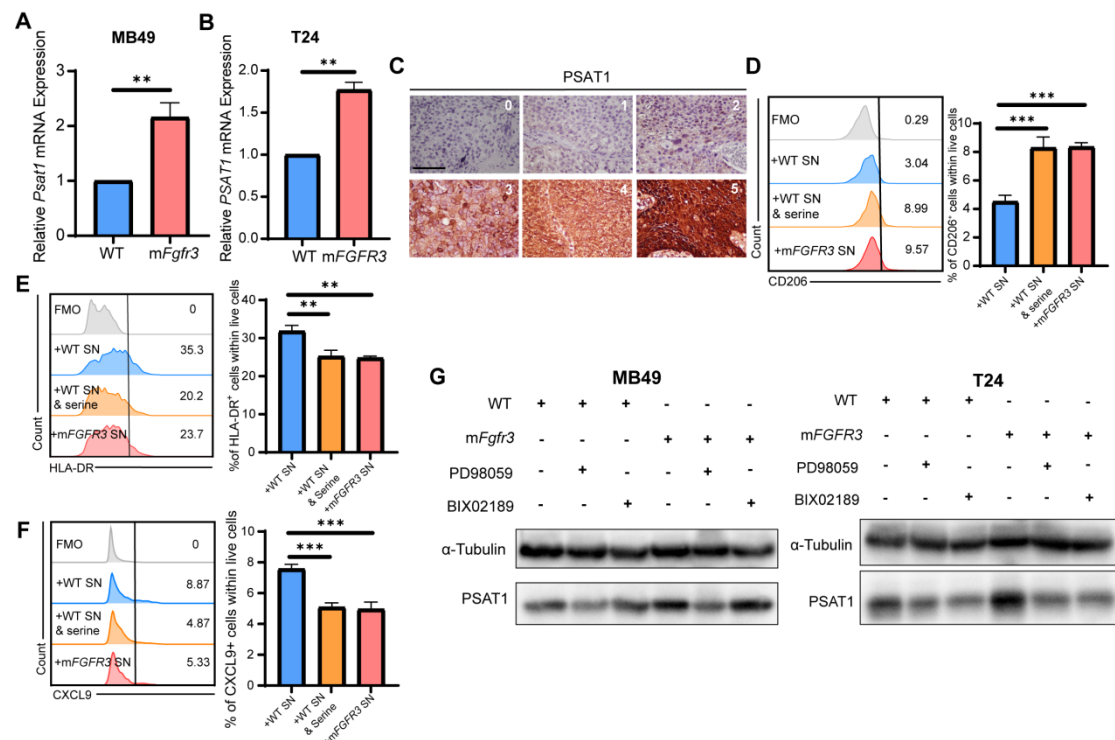

**Supplementary Figure 4: *mFGFR3* cancer cells upregulate serine synthesis to shift macrophages to an immune-inert phenotype, related to Figure 4.**

**A, B**, Statistic analysis of the qRT-PCR results shows the *Psat1* or *PSAT1* expression in the WT and mutant cancer cells.

**C**, Representative IHC pictures show different PSAT1 scores.

**D, E, F**, flow cytometry results and statistical analysis of the proportion of CD206<sup>+</sup> cells (**D**), HLA-DR<sup>+</sup> cells (**E**), and CXCL9<sup>+</sup> cells (**F**) within macrophages in the indicated groups from the THP-1 cell stimulated with cancer cell supernatant experiment, *n* = 6.

**G**, Western blot analysis of the PSAT1 expression following supplementing the ERK1/2 inhibitor (PD98059) or ERK5 inhibitor (BIX02189) in the indicated groups. Error bars represent the mean ± SEM. *p* < 0.05 was considered a significant difference, ns was no significance (one-way ANOVA with Holm-Sidak multiple comparison tests and unpaired parametric Student's t-test). \**p* < 0.05, \*\**p* < 0.01, \*\*\**p* < 0.001.

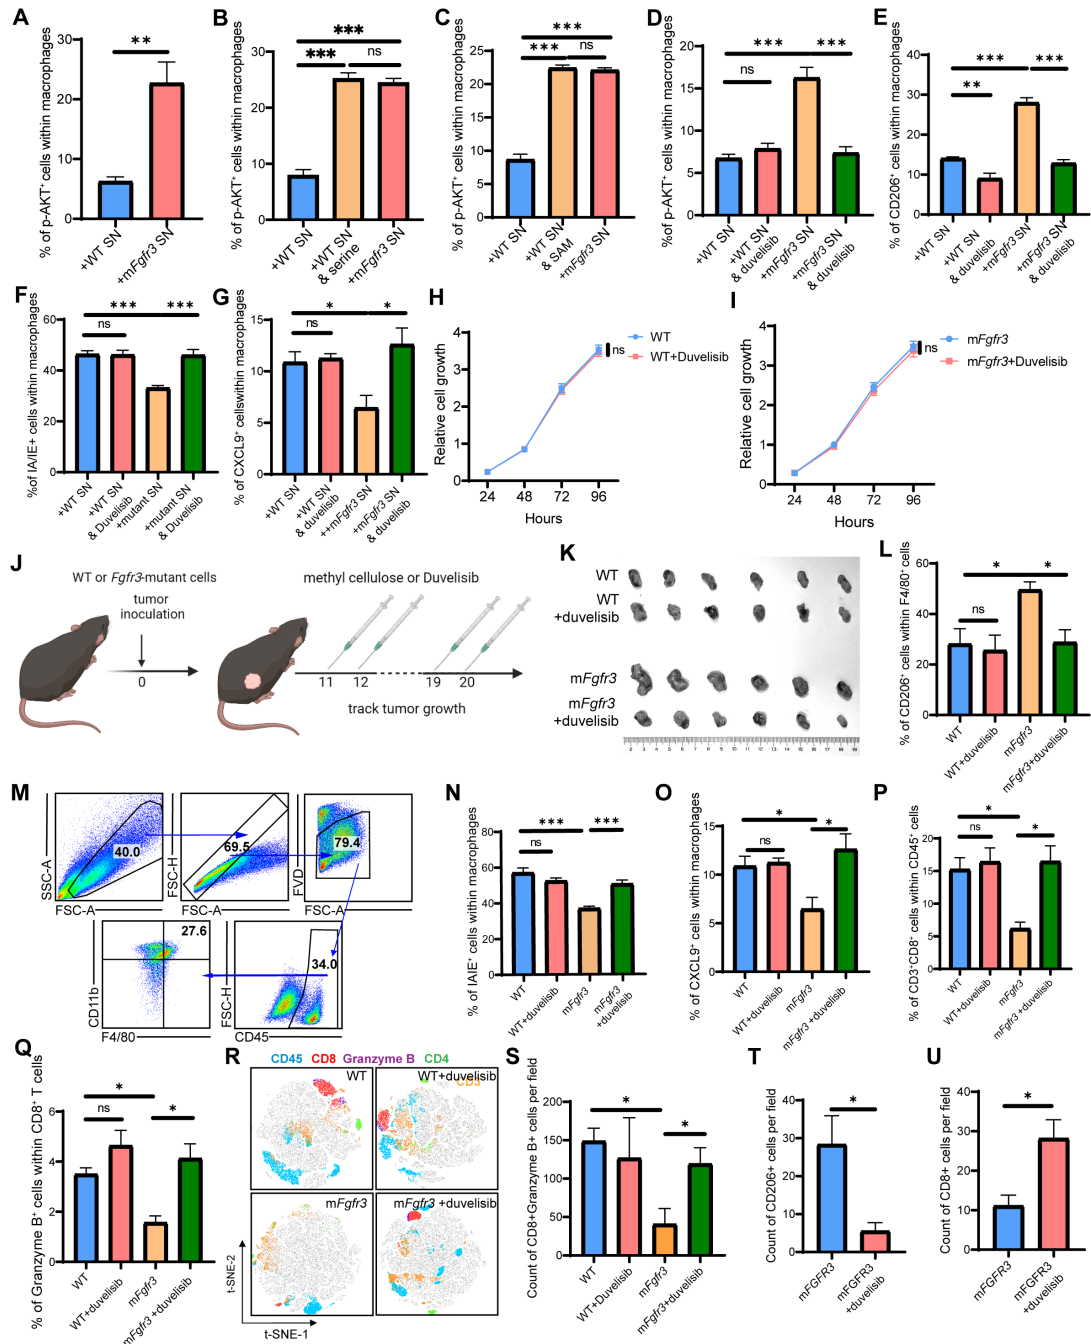

**Supplementary Figure 5: Targeting the PI3K/Akt pathway in macrophages reverses macrophage phenotypes in *mFgfr3* cancers, related to Figure 5.**

**A, B, C, D**, Statistical analysis of the proportion of p-AKT<sup>+</sup> cells within macrophages in the indicated groups.

**E, F, G**, Statistical analysis of the proportion of CD206<sup>+</sup> cells (**E**), IA/IE<sup>+</sup> cells (**F**), and CXCL9<sup>+</sup> cells (**G**) within macrophages in the indicated groups.

**H, I**, cell viability assays show the relative cell proliferation in the control group and duvelisib group on WT cells (**H**) and *mFgfr3* cells (**I**).

**J**, Schematic illustration shows the treatment plan of duvelisib in the WT and *mFgfr3*

tumors.

**K**, Picture of dissected tumors of the indicated groups in the duvelisib treatment experiment.

**L**, Statistical analysis illustrating the proportion of CD206<sup>+</sup> cells within macrophages in the indicated groups.

**M**, Gating strategy for flow cytometry analysis on macrophages in this study.

**N, O**, Statistical analysis illustrating the proportion of IA/IE<sup>+</sup> cells (**N**) and CXCL9<sup>+</sup> cells (**O**) within macrophages in the indicated groups.

**P, Q**, Statistical analysis illustrating the proportion of CD3<sup>+</sup>CD8<sup>+</sup> cells within CD45<sup>+</sup> cells (**P**) and the proportion of Granzyme B<sup>+</sup> cells within CD8<sup>+</sup> T cells (**Q**) in the indicated groups.

**R**, t-SNE plots show the landscape of T cell infiltration in the indicated groups.

**S**, Statistical analysis illustrating the proportion of CD8<sup>+</sup> Granzyme B<sup>+</sup> cells in the indicated groups.

**T, U**, Statistical analysis illustrating the proportion of CD206<sup>+</sup> cells (**T**) and CD8<sup>+</sup> cells (**U**) in the indicated groups.

Error bars represent the mean  $\pm$  SEM.  $p < 0.05$  was considered a significant difference, ns was no significance (one-way ANOVA with Holm-Sidak multiple comparison tests and unpaired parametric Student's t-test). \* $p < 0.05$ , \*\* $p < 0.01$ , \*\*\* $p < 0.001$ . (**J**: created with BioRender.com).

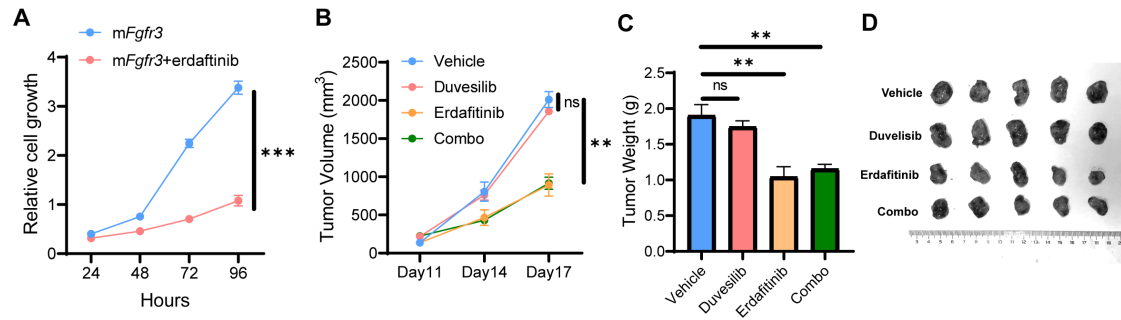

**Supplementary Figure 6: Duvelisib augments the anti-tumor efficacy of erdafitinib in combination therapy, related to Figure 6.**

**A**, cell viability assays show the relative cell proliferation in the control group and erdafitinib group on *mFgfr3* cells.

**B, C**, Growth curves (**B**) and tumor weights (**C**) of tumors in the indicated groups from the nude mice combination treatment experiment.

**D**, Picture of dissected tumors of the indicated groups from the nude mice combination treatment experiment.

Error bars represent the mean  $\pm$  SEM.  $p < 0.05$  was considered a significant difference, ns was no significance (one-way ANOVA with Holm-Sidak multiple comparison tests and unpaired parametric Student's t-test). \* $p < 0.05$ , \*\* $p < 0.01$ , \*\*\* $p < 0.001$ .
