# Supplementary material for: FGFR3 Alterations in Bladder Cancer Stimulate Serine Synthesis to Induce Immune-Inert Macrophages That Suppress T-cell Recruitment and Activation
Source: PubMed Central journal article supplement — Cancer Res. 2023 Sep 28;83(24):4030–46. doi: 10.1158/0008-5472.CAN-23-1065 (PMC10722136; doi:10.1158/0008-5472.can-23-1065), 2023-09-28
Supplement: can-23-1065_supplementary_materials_and_methods_suppsmm.pdf [file can-23-1065_supplementary_materials_and_methods_suppsmm.pdf]

## **Supplementary Materials and Methods**

### **Cancer cell supernatants preparation**

Once the T24 or MB49 cells reached 90% confluence, the medium was removed, and the flasks were washed twice with PBS. The cells were replenished with fresh complete RPMI 1640 or DMEM. The supernatant was collected after 72 h and centrifuged at 700 ×g for 10 min and 3220 ×g for 15 min at 4°C before being stored at –80°C.

### **Preparation and culture of mouse lymphocytes**

To obtain mouse lymphocyte suspensions, 6-to-8-week-old C57BL/6 mice were euthanized by CO<sub>2</sub> asphyxiation followed by cervical dislocation and immersed in 75% ethanol for 5 min, then transferred to the biosafety cabinet. The spleen was collected and placed in sterile 6-well plates (Corning Costar, cat# 07-200-83) with 3 mL 1× phosphate-buffered saline (PBS; cat# 10010, ThermoFisher) on ice. Spleen tissues were minced with a razor (cat# G535010, ThermoFisher) followed by digestion with 1× PBS solution supplemented with 1 mg/mL collagenase II, 1 mg/mL DNase, and 5% heat-inactivated FBS for 20 min at 37°C with 5% CO<sub>2</sub>. The digested tissues were then passed through 70-mm cell strainers (cat# BS-70-CS, Biosharp) using mechanical force with the rubber end of a 5-mL syringe. Cell suspensions were then treated with 0.1 M EDTA (cat# 15575, ThermoFisher) for 5 min at 37°C and washed two times with PBS. After the lysis of red blood cells with RBC lysis buffer (cat# CW0613S, CWBio), cells were collected by centrifugation at 450 ×g for 10 min at 4°C.

### ***In Vitro* lymphocyte co-culture assay**

For the lymphocyte co-culture assay,  $3 \times 10^5$  cancer cells or  $5 \times 10^5$  stimulated macrophages were seeded into each well of a 24-well plate. On the next day,  $5 \times 10^5$  lymphocytes were added to each well. After 48 h, the cell suspension was collected, and the flow cytometry staining was performed to evaluate the granzyme B level of the T cells.

### **Generation of the SYSMH cohort**

This study includes 34 patients with BCa who underwent NGS testing from Sun Yat-sen Memorial Hospital. Patients with incomplete clinical information, or missing pathological tissue sections were excluded from this study. 24 patients were identified as WT, while 10 patients were identified as *aFGFR3*. Clinicopathological data, including gender, age and tumor characteristics were collected. This retrospective analysis was approved by the ethics committee of Sun Yat-sen Memorial Hospital (approval number SYSKY-2023-422-01), and written informed consent was obtained from each enrolled patient.

### **IHC details**

Tissue sections were deparaffinized and subjected to heat-mediated antigen retrieval with Tris-EDTA (pH 9.0) in a Cuisinart high-pressure cooker. Bovine serum albumin (cat# ccs30014.01, MRC) was used to block non-specific protein-binding sites. The slides were incubated with primary antibodies followed by corresponding HRP-conjugated secondary antibodies (cat# MP-7451, cat# MP-7444, and cat# MP-7405, Vector). DAB staining (cat# K5007, DAKO) was performed, and the cells were counterstained with hematoxylin. The number of positively stained cells was manually counted in three high-power fields (400×).

### **Tumor-infiltrating lymphocyte classification**

For tumor-infiltrating lymphocyte classification, tumors were assessed by two pathologists and categorized into three groups: (1) "immune-desert" if tumors were with rare isolated lymphocytes in any tumor compartment; (2) "immune-excluded" if tumors were with lymphocytes only found at the invasive margin or within stroma, and with rare isolated lymphocytes in the intratumoral compartment; (3) "inflamed" if tumors were with lymphocytes present in stroma and infiltrating the tumor parenchyma, with direct contact with tumor cells.

### **Evaluation of PSAT1 IHC scores**

Two pathologists, who were blinded to the clinicopathological data, independently examined the tissue sections. The expression levels of PSAT1 were graded on a scale of 0 to 5: 0 indicated no expression, 1 indicated weak expression in

partial cells, 2 indicated moderate expression in partial cells, 3 indicated moderate expression in most cells, 4 indicated strong expression in most cells, and 5 indicated very strong expression in most cells (Supplementary Figure 4C). The scoring was performed on three representative high-power fields for each specimen (magnification ×400) and the average score was calculated.

### **Cell viability assay**

To measure the cell viability of cancer cells, we used a Cell Counting Kit 8 (CCK-8, cat# G4103, Servicebio) according to the manufacturer's instructions.
