# Supplementary material for: FGFR3 Alterations in Bladder Cancer Stimulate Serine Synthesis to Induce Immune-Inert Macrophages That Suppress T-cell Recruitment and Activation
Source: PubMed Central journal article supplement — Cancer Res. 2023 Sep 28;83(24):4030–46. doi: 10.1158/0008-5472.CAN-23-1065 (PMC10722136; doi:10.1158/0008-5472.can-23-1065), 2023-09-28
Supplement: can-23-1065_supplementary_tables_suppst1-st4.pdf [file can-23-1065_supplementary_tables_suppst1-st4.pdf]

## **Supplementary Tables for**

**FGFR3 alterations in bladder cancer stimulate serine synthesis to induce immune-inert macrophages that suppress T-cell recruitment and activation**

**Supplementary Table 1. Key resources and reagents used in this study.**

| <b>Reagents or Resources</b>                           | <b>Source</b>  | <b>Identifier</b>                  |
|--------------------------------------------------------|----------------|------------------------------------|
| <b>Antibodies</b>                                      |                |                                    |
| Brilliant Violet 421™ anti-mouse CD45 (30-F11)         | BioLegend      | Cat# 103134, RRID: AB_2562559      |
| Brilliant Violet 650™ anti-mouse CD8α (53-6.7)         | BioLegend      | Cat# 100741; RRID: AB_11124344     |
| PE anti-mouse CD3 (17A2)                               | BioLegend      | Cat# 100206, RRID: AB_312663       |
| PE/Cyanine7 anti-mouse CD4 (GK1.5)                     | BioLegend      | Cat# 100421, RRID: AB_312706       |
| Alexa Fluor 647 anti-human/mouse Granzyme B (GB11)     | BioLegend      | Cat# 515406, RRID: AB_2566333      |
| PE/Cyanine7 anti-mouse/human CD11b (M1/70)             | BioLegend      | Cat# 101215, RRID: AB_3127982      |
| Brilliant Violet 510™ anti-mouse F4/80 (BM8)           | BioLegend      | Cat# 123135, RRID: AB_2562622      |
| Alexa Fluor 647 anti-mouse CD206 (C068C2)              | BioLegend      | Cat# 141711, RRID: AB_10900240     |
| PE anti-mouse CXCL9 (MIG-2F5.5)                        | BioLegend      | Cat# 515603, RRID: AB_2245490      |
| Brilliant Violet 605™ anti-mouse I-A/I-E (M5/114.15.2) | BioLegend      | Cat# 107639, RRID: AB_2565894      |
| Phospho-AKT1 (Ser473) (SDRNR)                          | Thermo Fisher  | Cat# 12-9715-42, RRID: AB_2637101  |
| PE anti-human HLA-DR                                   | BioLegend      | Cat# 422302, RRID: AB_2818986      |
| PE anti-human CXCL9                                    | BD Biosciences | Cat# 566013, RRID: AB_2739458)     |
| Mouse anti-Alpha Tubulin Monoclonal                    | Proteintech    | Cat# 66031-1-Ig, RRID: AB_11042766 |
| Rabbit anti-Phospho-p44/42                             | Cell Signaling | Cat# 4s370, RRID: AB_2315112       |

|                                                                 |                              |                                       |
|-----------------------------------------------------------------|------------------------------|---------------------------------------|
| MAPK (Erk1/2)<br>(Thr202/Tyr204)                                | Technology                   |                                       |
| Rabbit anti-Phospho-Erk5<br>(Thr218/Tyr220)                     | Cell Signaling<br>Technology | Cat# 3371, RRID: AB_2140424           |
| Rabbit anti-PSAT1                                               | Proteintech                  | Cat# 10501-1-AP, RRID:<br>AB_2172597  |
| Mouse anti-AKT                                                  | Proteintech                  | Cat# 60203-2-Ig, RRID:<br>AB_10912803 |
| Rabbit anti-Tri-Methyl<br>Lysine Motif [tme-K]<br>(D1L1X)       | Cell Signaling<br>Technology | Cat# 14680, RRID: AB_2798568          |
| HRP-labeled Goat Anti-<br>Rabbit IgG (H+L) antibody<br>(for WB) | Servicebio                   | Cat# GB23303, RRID:<br>AB_2811189     |
| HRP-labeled Goat anti-<br>mouse IgG antibody (for<br>WB)        | Servicebio                   | Cat# GB23301, RRID:<br>AB_2904020     |
| Rabbit anti-F4/80 (D2S9R)                                       | Cell Signaling<br>Technology | Cat# 70076, RRID: AB_2799771          |
| Rabbit anti-CD206/MRC1<br>(E6T5J)                               | Cell Signaling<br>Technology | Cat# 24595, RRID: AB_2892682          |
| Goat Anti-Mouse Cxcl9 /<br>mig Polyclonal antibody              | R&D Systems                  | Cat# AF-492-NA, RRID:<br>AB_2086734   |
| Rabbit monoclonal anti-<br>CD8 (D4W2Z)                          | Cell Signaling<br>Technology | Cat# 98941, RRID: AB_2756376          |
| Rabbit anti-Granzyme B<br>(D6E9W)                               | Cell Signaling<br>Technology | Cat# 46890, RRID: AB_2799313          |
| Mouse anti-CD68 (PG-M1)                                         | Zhongshan<br>Golden Bridge   | Cat# ZM-0464                          |
| Mouse anti-HLA-DR                                               | Zhongshan<br>Golden Bridge   | Cat# ZM-0136                          |
| Rabbit anti-CD8 Antibody                                        | Abcam                        | Cat# MA5-14548, RRID:<br>AB_10984334  |

|                                                             |                     |                                |
|-------------------------------------------------------------|---------------------|--------------------------------|
| HRP Goat Anti-Rabbit IgG Polymer Detection Kit (for IHC/IF) | Vector Laboratories | Cat# MP-7451; RRID: AB_2631198 |
| HRP Goat Anti-Mouse IgG Polymer Detection Kit (for IHC/IF)  | Vector Laboratories | Cat# MP-7444; RRID: AB_2336530 |
| HRP Horse anti-Goat IgG Polymer Detection Kit (for IHC/IF)  | Vector Laboratories | Cat# MP-7405; RRID: AB_2336526 |
| <b>Chemicals, peptides, and recombinant proteins</b>        |                     |                                |
| Collagenase, type I                                         | Servicebio          | Cat# GC305013                  |
| Collagenase, type II                                        | Servicebio          | Cat# GC305014                  |
| Collagenase, type IV                                        | Servicebio          | Cat# GC305015                  |
| 0.25% Trypsin-EDTA                                          | Gibco               | Cat# R001100                   |
| DNase                                                       | Servicebio          | Cat# 1121MG010                 |
| Fixation and Permeabilization Solution                      | BD Biosciences      | Cat# 554722                    |
| Perm/Wash Buffer                                            | BD Biosciences      | Cat# 554723                    |
| Fixable Viability Stain 510                                 | BD Biosciences      | Cat# 564406                    |
| Fixable Viability Stain 700                                 | BD Biosciences      | Cat# 564997                    |
| Diaminobenzidine (DAB)                                      | DAKO                | Cat# K5007                     |
| Hematoxylin                                                 | Biosharp            | Cat# BL702A                    |
| SYBR Premix Ex Taq II                                       | Yeasen              | Cat# 11200ES03                 |
| Duvelisib                                                   | APExBIO             | Cat# A1720                     |
| Erdafitinib                                                 | MCE                 | Cat# JNJ-42756493              |
| S-Adenosyl-L-methionine chloride dihydrochloride            | Sigma-Aldrich       | Cat# A7007                     |
| L-phenylglycine                                             | Sigma-Aldrich       | Cat# 2935-35-5                 |
| RIPA Lysis Buffer                                           | CWBIO               | Cat# CW2333S                   |
| BCA Protein Assay Kit                                       | CWBIO               | Cat# CW0014S                   |

|                                                  |                     |                                                                                        |
|--------------------------------------------------|---------------------|----------------------------------------------------------------------------------------|
| Protease inhibitor Cocktail                      | CWBIO               | Cat# CW2200S                                                                           |
| Phosphatase Inhibitor Cocktail                   | CWBIO               | Cat# CW2383S                                                                           |
| Immobilon Western Chemiluminescent HRP Substrate | Millipore           | Cat# WBKLS0500                                                                         |
| RBC lysis buffer                                 | CWBIO               | Cat# CW0613S                                                                           |
| Macrophage colony-stimulating factor             | Sino Biological     | Cat# 51112-MNAH                                                                        |
| <b>Critical commercial assays</b>                |                     |                                                                                        |
| RNA Quick Purification kit                       | EZbioscience        | Cat# B0004DP                                                                           |
| PANO Multiplex IHC kit                           | PANOVUE             | Cat# 10203100100                                                                       |
| DL-Serine Assay Kit                              | Sigma-Aldrich       | Cat# MAK352                                                                            |
| <b>Experimental models: Cell lines</b>           |                     |                                                                                        |
| T24                                              | ATCC                | Cat# HTB-4                                                                             |
| MB49                                             | Millipore           | Cat# SCC148                                                                            |
| THP-1                                            | ATCC                | Cat# TIB-202                                                                           |
| <b>Experimental models: Organisms/strains</b>    |                     |                                                                                        |
| Mouse: C57BL/6J                                  | Hunan Silaikejingda | N/A                                                                                    |
| Mouse: BALB/c Nude mouse                         | Beijing Vital River | N/A                                                                                    |
| Mouse: huPMBC-NOG-dKO humanoid mouse             | Beijing Vital River | N/A                                                                                    |
| <b>Oligonucleotides</b>                          |                     |                                                                                        |
| Primers, see Supplementary Table 3               | This paper          | N/A                                                                                    |
| <b>Software and algorithms</b>                   |                     |                                                                                        |
| Prism 9                                          | GraphPad Software   | RRID: SCR_002798,<br><a href="https://www.graphpad.com/">https://www.graphpad.com/</a> |
| FlowJo 10.7                                      | Treestar            | RRID: SCR_008520,<br><a href="https://www.flowjo.com/">https://www.flowjo.com/</a>     |

|                     |                    |                                                                                                                             |
|---------------------|--------------------|-----------------------------------------------------------------------------------------------------------------------------|
| CytoFLEX 2.5        | Beckman<br>Coulter | RRID: SCR_019627,<br><a href="https://www.beckmancoulter.com">https://www.beckmancoulter.com</a>                            |
| GSEA software 4.2.2 | Broad Institute    | RRID: SCR_003199,<br><a href="http://www.broadinstitute.org/gsea">http://www.broadinstitute.org/gsea</a>                    |
| R 4.0.5             | N/A                | RRID: SCR_001905,<br><a href="https://www.r-project.org/">https://www.r-project.org/</a>                                    |
| Cell Ranger 4.0     | 10x Genomics       | RRID: SCR_017344,<br><a href="https://www.10xgenomics.com/support">https://www.10xgenomics.com/support</a>                  |
| Seurat 4.2.0        | Satija Lab         | RRID: SCR_016341,<br><a href="https://satijalab.org/seurat/">https://satijalab.org/seurat/</a>                              |
| SeuratWrapper 0.3.0 | Satija Lab         | RRID:SCR_022555,<br><a href="https://github.com/satijalab/seurat-wrappers">https://github.com/satijalab/seurat-wrappers</a> |
| inForm              | Akoya              | RRID: SCR_019155,<br><a href="https://www.akoyabio.com/">https://www.akoyabio.com/</a>                                      |
| Phenochart          | Akoya              | RRID: SCR_019156,<br><a href="https://www.akoyabio.com/">https://www.akoyabio.com/</a>                                      |

**Supplementary Table 2. Gene set used for GSEA analysis on macrophages in this study.**

| Gene sets                                                      | Source                                                                                                                                                                                                                                                                                  |
|----------------------------------------------------------------|-----------------------------------------------------------------------------------------------------------------------------------------------------------------------------------------------------------------------------------------------------------------------------------------|
| GOBP_ANTIGEN_PROCESSING_AND_PRESENTATION_OF_ENDOGENOUS_ANTIGEN | <a href="https://www.gsea-msigdb.org/gsea/msigdb/human/geneset/GOBP_ANTIGEN_PROCESSING_AND_PRESENTATION_OF_ENDOGENOUS_ANTIGEN">https://www.gsea-msigdb.org/gsea/msigdb/human/geneset/GOBP_ANTIGEN_PROCESSING_AND_PRESENTATION_OF_ENDOGENOUS_ANTIGEN</a>                                 |
| GOBP_LYMPHOCYTE_CHEMOTAXIS                                     | <a href="https://www.gsea-msigdb.org/gsea/msigdb/human/geneset/GOBP_LYMPHOCYTE_CHEMOTAXIS">https://www.gsea-msigdb.org/gsea/msigdb/human/geneset/GOBP_LYMPHOCYTE_CHEMOTAXIS</a>                                                                                                         |
| JAK/STAT Signaling                                             | <a href="https://www.gsea-msigdb.org/gsea/msigdb/human/geneset/KEGG_JAK_STAT_SIGNALING_PATHWAY">https://www.gsea-msigdb.org/gsea/msigdb/human/geneset/KEGG_JAK_STAT_SIGNALING_PATHWAY</a>                                                                                               |
| JAK/STAT Cascade                                               | <a href="https://www.gsea-msigdb.org/gsea/msigdb/human/geneset/JAK_STAT_CASCADE">https://www.gsea-msigdb.org/gsea/msigdb/human/geneset/JAK_STAT_CASCADE</a>                                                                                                                             |
| NFKB Pathway                                                   | <a href="https://www.gsea-msigdb.org/gsea/msigdb/human/geneset/BIOCARTA_NFKB_PATHWAY">https://www.gsea-msigdb.org/gsea/msigdb/human/geneset/BIOCARTA_NFKB_PATHWAY</a>                                                                                                                   |
| TGFB Pathway                                                   | <a href="https://www.gsea-msigdb.org/gsea/msigdb/human/geneset/BIOCARTA_TGFB_PATHWAY">https://www.gsea-msigdb.org/gsea/msigdb/human/geneset/BIOCARTA_TGFB_PATHWAY</a>                                                                                                                   |
| GMCSF Pathway                                                  | <a href="https://www.gsea-msigdb.org/gsea/msigdb/human/geneset/PID_GMCSF_PATHWAY">https://www.gsea-msigdb.org/gsea/msigdb/human/geneset/PID_GMCSF_PATHWAY</a>                                                                                                                           |
| PPARG-KO MACROPHAGE DN                                         | <a href="https://www.gsea-msigdb.org/gsea/msigdb/human/geneset/GSE24292_WT_VS_PPARG_KO_MACROPHAGE_DN">https://www.gsea-msigdb.org/gsea/msigdb/human/geneset/GSE24292_WT_VS_PPARG_KO_MACROPHAGE_DN</a>                                                                                   |
| TLR4 induced NFKB AND MAPK Activation Signaling                | <a href="https://www.gsea-msigdb.org/gsea/msigdb/human/geneset/REACTOME_NFKB_AND_MAP_KINASES_ACTIVATION_MEDIATED_BY_TLR4_SIGNALING_REPERTOIRE">https://www.gsea-msigdb.org/gsea/msigdb/human/geneset/REACTOME_NFKB_AND_MAP_KINASES_ACTIVATION_MEDIATED_BY_TLR4_SIGNALING_REPERTOIRE</a> |
| TGFB Treated Macrophages UP                                    | <a href="https://www.gsea-msigdb.org/gsea/msigdb/human/geneset/GSE45382_UNTREATED_VS_TGFB_TREATED_MACROPHAGES_UP">https://www.gsea-msigdb.org/gsea/msigdb/human/geneset/GSE45382_UNTREATED_VS_TGFB_TREATED_MACROPHAGES_UP</a>                                                           |
| PI3K/AKT/mTOR Signaling                                        | <a href="https://www.gsea-msigdb.org/gsea/msigdb/human/geneset/HALLMARK_PI3K_AKT_MTOR_SIGNALING">https://www.gsea-msigdb.org/gsea/msigdb/human/geneset/HALLMARK_PI3K_AKT_MTOR_SIGNALING</a>                                                                                             |

---

PI3K Cascade

[https://www.gsea-  
msigdb.org/gsea/msigdb/cards/REACTOME\\_PI3K\\_  
CASCADE](https://www.gsea-msigdb.org/gsea/msigdb/cards/REACTOME_PI3K_CASCADE)

---



**Supplementary Table 3. Primer sequences used in this study.**

| Gene          |   | Sequence                |
|---------------|---|-------------------------|
| <i>Cxcl9</i>  | F | TCCTTTTGGGCATCATCTTCC   |
|               | R | TTTGTAGTGGATCGTGCCTCG   |
| <i>Cxcl10</i> | F | CCAAGTGCTGCCGTCATTTTC   |
|               | R | GGCTCGCAGGGATGATTTCAA   |
| <i>Cxcl11</i> | F | GGCTTCCTTATGTTCAAACAGGG |
|               | R | GCCGTTACTCGGGTAAATTACA  |
| <i>Cd74</i>   | F | AGTGCGACGAGAACGGTAAC    |
|               | R | CGTTGGGGAACACACACCA     |
| <i>PSAT1</i>  | F | TGCCGCACTCAGTGTTGTTAG   |
|               | R | GCAATTCCC GCACAAGATTCT  |
| <i>Psat1</i>  | F | CTTAGCACCATGGAAGCCAC    |
|               | R | TCCAGCTTTCAGGCCAATCA    |

**Supplementary Table 4. The clinicopathologic characteristics of the SYSMH cohort.**

| <b>Variables</b>     | <b><i>FGFR3</i>-WT<br/>(<i>n</i> = 24)</b> | <b><i>FGFR3</i>-altered<br/>(<i>n</i> = 10)</b> |
|----------------------|--------------------------------------------|-------------------------------------------------|
| Age (y, median, IQR) | 63 (54.75- 70.25)                          | 60.5 (57- 65)                                   |
| <65                  | 13 (54.2%)                                 | 7 (70.0%)                                       |
| ≥65                  | 11 (45.8%)                                 | 3 (30.0%)                                       |
| Gender               |                                            |                                                 |
| Male                 | 20 (83.3%)                                 | 7 (70.0%)                                       |
| Female               | 4 (16.7%)                                  | 3 (30.0%)                                       |
| Tumor size (cm)      |                                            |                                                 |
| <3                   | 10 (41.7%)                                 | 6 (60.0%)                                       |
| ≥3                   | 14 (58.3%)                                 | 4 (40.0%)                                       |
| Multifocality        |                                            |                                                 |
| Unifocal             | 21 (87.5%)                                 | 5 (50.0%)                                       |
| Multifocal           | 3 (12.5%)                                  | 5 (50.0%)                                       |
| TNM stage            |                                            |                                                 |
| I-II                 | 11 (45.8%)                                 | 9 (90.0%)                                       |
| III-IV               | 13 (54.2%)                                 | 1 (10.0%)                                       |
